# Supplementary material
Source: ML conference proceedings conference paper supplement (https://openreview.net/forum?id=6tOALaimfU)
Supplement: supplementary_material [file attachment]

# XRefine: Attention-Guided Keypoint Match Refinement

## Supplementary Material

| Extract+Match | Refinement       | AUC5         | AUC10        | AUC20        |
|---------------|------------------|--------------|--------------|--------------|
| ALIKED+LG     |                  | 10.71        | 21.16        | 34.02        |
| ALIKED+LG     | Keypt2Subpx      | 12.32        | 23.21        | 36.14        |
| ALIKED+LG     | PixSfM           | 23.23        | 34.34        | 45.82        |
| ALIKED+LG     | XRefine general  | <u>29.31</u> | <u>41.01</u> | <u>52.06</u> |
| ALIKED+LG     | XRefine specific | <b>29.41</b> | <b>41.07</b> | <b>52.07</b> |
| DISK+LG       |                  | 62.24        | 74.13        | 82.67        |
| DISK+LG       | Keypt2Subpx      | 63.77        | 75.35        | 83.53        |
| DISK+LG       | PixSfM           | 63.52        | 75.14        | 83.36        |
| DISK+LG       | XRefine general  | <u>64.13</u> | <u>75.58</u> | <u>83.67</u> |
| DISK+LG       | XRefine specific | <b>64.93</b> | <b>76.27</b> | <b>84.20</b> |
| DeDoDe2+DSM   |                  | 35.90        | 50.22        | 62.76        |
| DeDoDe2+DSM   | Keypt2Subpx      | 46.58        | 59.91        | 70.66        |
| DeDoDe2+DSM   | PixSfM           | 48.45        | 61.16        | 71.28        |
| DeDoDe2+DSM   | XRefine general  | <b>51.28</b> | <b>63.87</b> | <b>73.63</b> |
| DeDoDe2+DSM   | XRefine specific | <u>50.94</u> | <u>63.58</u> | <u>73.42</u> |
| R2D2+MNN      |                  | 45.13        | 57.83        | 68.02        |
| R2D2+MNN      | Keypt2Subpx      | 46.03        | 58.61        | 68.61        |
| R2D2+MNN      | PixSfM           | 46.63        | 58.77        | 68.39        |
| R2D2+MNN      | XRefine general  | <u>47.88</u> | <u>60.01</u> | <u>69.54</u> |
| R2D2+MNN      | XRefine specific | <b>49.38</b> | <b>61.45</b> | <b>70.79</b> |

Table 9. Pose estimation result on MegaDepth [17]. Bold indicates best performance and underscores second best per feature.

## 6. Results

**Additional feature extractors** Tables 9 to 11 present relative pose estimation results on MegaDepth [17], ScanNet [4], and KITTI [10] for four additional combinations of feature extractor and matcher: ALIKED [34] with LightGlue (LG) [19] matching, DISK [31] with LightGlue (L-G) matching, DeDoDev2 [7] with Double Soft Max (DSM) matching, and R2D2 [26] with Mutual Nearest Neighbor (MNN) matching. Besides for ALIKED+LG on KITTI, where all refinement approaches perform very similarly, XRefine achieves the best performance. Quite striking is the performance improvement that can be achieved for ALIKED+LG on MegaDepth, where the AUC5 without refinement is 10.71% and 29.41% when using XRefine specific.

**Comparison of Keypt2Subpx weights** Table 12 presents the results that we obtained for Keypt2Subpx when using the original weights provided by the authors (<https://github.com/KimSinjeong/keypt2subpx/tree/master/pretrained>) and the weights that we obtained using the same training procedure as for XRe-

| Extract+Match | Refinement       | AUC5         | AUC10        | AUC20        |
|---------------|------------------|--------------|--------------|--------------|
| ALIKED+LG     |                  | 20.73        | 38.26        | 54.84        |
| ALIKED+LG     | Keypt2Subpx      | 20.93        | 38.31        | 54.81        |
| ALIKED+LG     | PixSfM           | 20.87        | 38.27        | 54.60        |
| ALIKED+LG     | XRefine general  | <u>21.70</u> | <u>39.37</u> | <u>55.74</u> |
| ALIKED+LG     | XRefine specific | <b>21.82</b> | <b>39.50</b> | <b>55.79</b> |
| DISK+LG       |                  | 18.48        | 34.24        | 49.12        |
| DISK+LG       | Keypt2Subpx      | 18.77        | 34.63        | 49.63        |
| DISK+LG       | PixSfM           | 18.50        | 33.98        | 48.98        |
| DISK+LG       | XRefine general  | <u>19.10</u> | <b>35.23</b> | <b>50.29</b> |
| DISK+LG       | XRefine specific | <b>19.39</b> | <u>35.21</u> | <u>50.17</u> |
| DeDoDe2+DSM   |                  | 14.48        | 28.91        | 43.80        |
| DeDoDe2+DSM   | Keypt2Subpx      | 16.43        | 31.64        | 46.84        |
| DeDoDe2+DSM   | PixSfM           | 16.10        | 30.93        | 45.97        |
| DeDoDe2+DSM   | XRefine general  | <b>17.21</b> | <u>32.40</u> | <u>47.61</u> |
| DeDoDe2+DSM   | XRefine specific | <u>17.06</u> | <b>32.47</b> | <b>47.70</b> |
| R2D2+MNN      |                  | 12.14        | 24.68        | 38.56        |
| R2D2+MNN      | Keypt2Subpx      | <u>12.60</u> | 25.23        | 38.98        |
| R2D2+MNN      | PixSfM           | 11.84        | 24.00        | 37.59        |
| R2D2+MNN      | XRefine general  | <u>12.60</u> | <u>25.59</u> | <u>39.46</u> |
| R2D2+MNN      | XRefine specific | <b>12.63</b> | <b>25.72</b> | <b>39.57</b> |

Table 10. Pose estimation result on ScanNet [4]. Bold indicates best performance and underscores second best per feature.

fine. At this moment in time, from the combinations of feature extractors and matchers that are considered by us, only weights for SuperPoint with LightGlue matching, DeDoDe with Double Soft Max matching, XFeat with Mutual Nearest Neighbor matching, and ALIKED with LightGlue matching are available. We observe very similar results for Keypt2Subpx with the original weights and with our weights. Only in one case (XFeat+MNN on MegaDepth) the AUC5 reached with our weights is more than 0.1 percentage points lower than with the original weights, while in 8 out of the 12 evaluations our weights have slightly higher AUC5 than the original weights. The small differences in performance can be explained by the stochastic nature of the training process.

**Varying numbers of keypoints for DeDoDe** Similarly to Tab. 7, the Tab. 13 presents the pose estimation performance for varying numbers of extracted keypoints per image, but for DeDoDe [8] features. In our evaluation, the best performance without refinement is reached at 16384 keypoints, while the best performance with refinement is reached at 8192 keypoints. We observe diminishing perfor-

| Extract+Match | Refinement       | AUC5         | AUC10        | AUC20        |
|---------------|------------------|--------------|--------------|--------------|
| ALIKED+LG     |                  | 82.14        | 91.07        | 95.54        |
| ALIKED+LG     | Keypt2Subpx      | <b>84.73</b> | <b>91.70</b> | <u>95.63</u> |
| ALIKED+LG     | PixSfM           | 84.34        | 91.52        | 95.54        |
| ALIKED+LG     | XRefine general  | <u>84.70</u> | <b>91.70</b> | <b>95.64</b> |
| ALIKED+LG     | XRefine specific | 84.67        | 91.69        | <u>95.63</u> |
| DISK+LG       |                  | 84.14        | 91.47        | <b>95.58</b> |
| DISK+LG       | Keypt2Subpx      | 84.48        | 91.52        | 95.42        |
| DISK+LG       | PixSfM           | 84.19        | 91.38        | 95.35        |
| DISK+LG       | XRefine general  | <u>84.55</u> | <u>91.57</u> | 95.43        |
| DISK+LG       | XRefine specific | <b>84.63</b> | <b>91.63</b> | 95.48        |
| DeDoDe2+DSM   |                  | 83.59        | 91.22        | 95.45        |
| DeDoDe2+DSM   | Keypt2Subpx      | 84.16        | 91.49        | 95.56        |
| DeDoDe2+DSM   | PixSfM           | 84.15        | 91.46        | 95.57        |
| DeDoDe2+DSM   | XRefine general  | <u>84.44</u> | <u>91.67</u> | <u>95.67</u> |
| DeDoDe2+DSM   | XRefine specific | <b>84.52</b> | <b>91.70</b> | <b>95.69</b> |
| R2D2+MNN      |                  | 83.37        | 90.99        | 95.25        |
| R2D2+MNN      | Keypt2Subpx      | 83.49        | 91.12        | 95.33        |
| R2D2+MNN      | PixSfM           | 84.28        | 91.51        | 95.60        |
| R2D2+MNN      | XRefine general  | <u>84.38</u> | <u>91.57</u> | <u>95.64</u> |
| R2D2+MNN      | XRefine specific | <b>84.56</b> | <b>91.66</b> | <b>95.68</b> |

Table 11. Pose estimation result on KITTI [10] odometry. Bold indicates best performance and underscores second best per feature.

mance gains from refinement as the number of keypoints increases. This is expected because, when fewer matches are available, the accuracy of individual keypoint correspondences plays a more critical role in pose estimation. At 32768 keypoints the pose estimation accuracy when using Keypt2Subpx even becomes slightly worse than without refinement. With XRefine, on the other hand, accuracy is still increased, *e.g.* the AUC5 with XRefine specific is about 7% higher than without refinement.

**Qualitative results** Figure 5 presents visualizations of four refinement examples for our XRefine, Keypt2Subpx [14], and PixSfM [18].

| Dataset     | Extract+Match | Refinement                     | AUC5  | AUC10 | AUC20 |
|-------------|---------------|--------------------------------|-------|-------|-------|
| MegaDepth   | SP+LG         |                                | 58.48 | 71.41 | 80.83 |
| MegaDepth   | SP+LG         | Keypt2Subpx (original weights) | 60.06 | 72.70 | 81.78 |
| MegaDepth   | SP+LG         | Keypt2Subpx (our weights)      | 60.16 | 72.73 | 81.78 |
| MegaDepth   | DeDoDe+DSM    |                                | 34.88 | 48.64 | 60.84 |
| MegaDepth   | DeDoDe+DSM    | Keypt2Subpx (original weights) | 44.02 | 57.27 | 68.14 |
| MegaDepth   | DeDoDe+DSM    | Keypt2Subpx (our weights)      | 44.86 | 58.08 | 68.84 |
| MegaDepth   | XFeat+MNN     |                                | 36.45 | 47.89 | 57.81 |
| MegaDepth   | XFeat+MNN     | Keypt2Subpx (original weights) | 38.34 | 49.56 | 59.15 |
| MegaDepth   | XFeat+MNN     | Keypt2Subpx (our weights)      | 38.01 | 49.06 | 58.52 |
| MegaDepth   | ALIKED+LG     |                                | 10.71 | 21.16 | 34.02 |
| MegaDepth   | ALIKED+LG     | Keypt2Subpx (original weights) | 11.37 | 22.01 | 34.87 |
| MegaDepth   | ALIKED+LG     | Keypt2Subpx (our weights)      | 12.32 | 23.21 | 36.14 |
| ScanNet1500 | SP+LG         |                                | 19.48 | 37.40 | 54.79 |
| ScanNet1500 | SP+LG         | Keypt2Subpx (original weights) | 20.11 | 38.14 | 55.38 |
| ScanNet1500 | SP+LG         | Keypt2Subpx (our weights)      | 20.31 | 38.21 | 55.43 |
| ScanNet1500 | DeDoDe+DSM    |                                | 10.13 | 21.04 | 32.42 |
| ScanNet1500 | DeDoDe+DSM    | Keypt2Subpx (original weights) | 11.11 | 22.71 | 34.92 |
| ScanNet1500 | DeDoDe+DSM    | Keypt2Subpx (our weights)      | 11.20 | 23.02 | 34.99 |
| ScanNet1500 | XFeat+MNN     |                                | 10.28 | 22.04 | 35.77 |
| ScanNet1500 | XFeat+MNN     | Keypt2Subpx (original weights) | 11.33 | 23.58 | 37.39 |
| ScanNet1500 | XFeat+MNN     | Keypt2Subpx (our weights)      | 11.27 | 23.32 | 37.08 |
| ScanNet1500 | ALIKED+LG     |                                | 20.73 | 38.26 | 54.84 |
| ScanNet1500 | ALIKED+LG     | Keypt2Subpx (original weights) | 21.01 | 38.54 | 55.04 |
| ScanNet1500 | ALIKED+LG     | Keypt2Subpx (our weights)      | 20.93 | 38.31 | 54.81 |
| KITTI       | SP+LG         |                                | 83.37 | 90.84 | 95.12 |
| KITTI       | SP+LG         | Keypt2Subpx (original weights) | 83.59 | 90.90 | 95.12 |
| KITTI       | SP+LG         | Keypt2Subpx (our weights)      | 83.63 | 90.93 | 95.14 |
| KITTI       | DeDoDe+DSM    |                                | 83.98 | 91.31 | 95.42 |
| KITTI       | DeDoDe+DSM    | Keypt2Subpx (original weights) | 84.16 | 91.40 | 95.49 |
| KITTI       | DeDoDe+DSM    | Keypt2Subpx (our weights)      | 84.21 | 91.42 | 95.50 |
| KITTI       | XFeat+MNN     |                                | 81.55 | 89.99 | 94.79 |
| KITTI       | XFeat+MNN     | Keypt2Subpx (original weights) | 82.21 | 90.38 | 94.97 |
| KITTI       | XFeat+MNN     | Keypt2Subpx (our weights)      | 82.42 | 90.47 | 95.00 |
| KITTI       | ALIKED+LG     |                                | 82.14 | 91.07 | 95.54 |
| KITTI       | ALIKED+LG     | Keypt2Subpx (original weights) | 84.77 | 91.73 | 95.64 |
| KITTI       | ALIKED+LG     | Keypt2Subpx (our weights)      | 84.73 | 91.70 | 95.63 |

Table 12. Comparison of Keypt2Subpx results using the original weights from the authors and our retrained weights.

| #KP per image | Refinement       | AUC5         | AUC10        | AUC20        |
|---------------|------------------|--------------|--------------|--------------|
| 2048          |                  | 38.54        | 53.92        | 67.75        |
| 2048          | Keyp2Subpx       | 47.75        | 62.87        | 74.68        |
| 2048          | XRefine specific | <b>52.34</b> | <b>66.65</b> | <b>77.56</b> |
| 2048          | XRefine general  | <u>52.32</u> | <u>66.38</u> | <u>77.04</u> |
| 4096          |                  | 45.05        | 59.90        | 72.44        |
| 4096          | Keyp2Subpx       | 51.65        | 65.94        | 77.21        |
| 4096          | XRefine specific | <b>55.67</b> | <b>69.10</b> | <b>79.18</b> |
| 4096          | XRefine general  | <u>55.20</u> | <u>68.73</u> | <u>78.79</u> |
| 8192          |                  | 49.63        | 63.57        | 74.75        |
| 8192          | Keyp2Subpx       | 52.82        | 66.62        | 77.25        |
| 8192          | XRefine specific | <b>56.51</b> | <b>69.80</b> | <b>79.33</b> |
| 8192          | XRefine general  | <b>56.51</b> | <u>69.29</u> | <u>78.84</u> |
| 16384         |                  | 51.68        | 65.03        | 75.49        |
| 16384         | Keyp2Subpx       | 52.66        | 65.90        | 76.10        |
| 16384         | XRefine specific | <u>56.29</u> | <b>69.06</b> | <b>78.29</b> |
| 16384         | XRefine general  | <b>56.32</b> | <u>68.69</u> | <u>77.99</u> |
| 32768         |                  | 51.26        | 63.95        | 73.53        |
| 32768         | Keyp2Subpx       | 50.49        | 63.62        | 73.70        |
| 32768         | XRefine specific | <b>54.95</b> | <b>67.13</b> | <b>76.08</b> |
| 32768         | XRefine general  | <u>54.69</u> | <u>66.91</u> | <u>75.81</u> |

Table 13. Results for varying numbers of extracted keypoints (KPs) per image on MegaDepth1500 [17] with DeDoDe [8] features and double soft max matching.

### XRefine

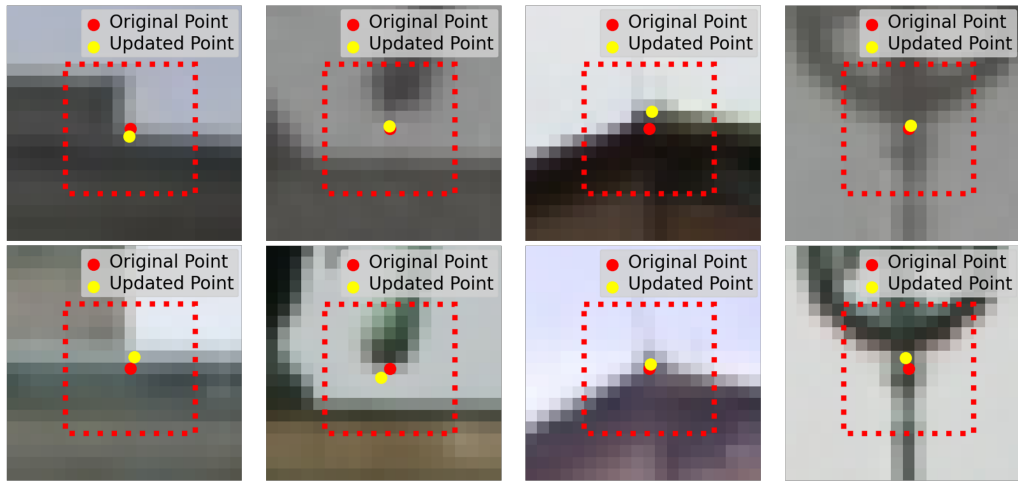

### KeypSubpx

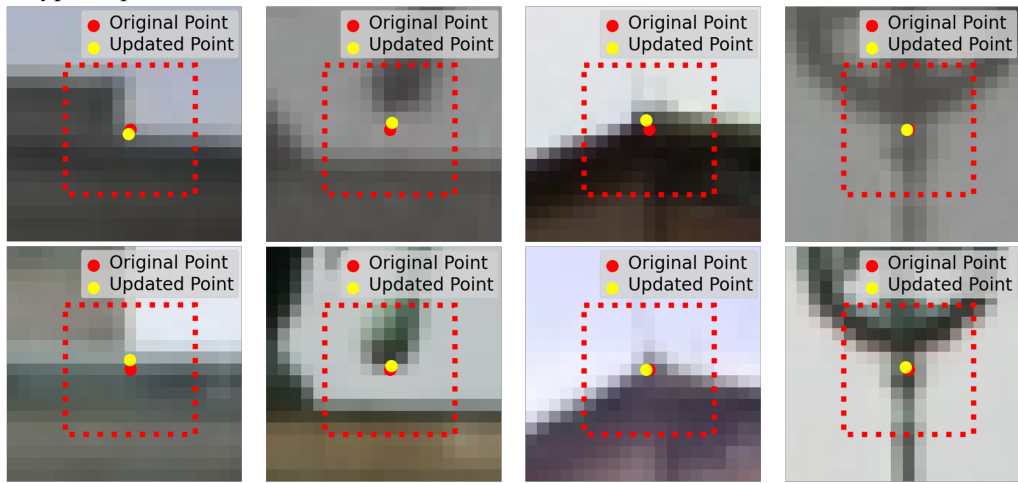

### PixSfM

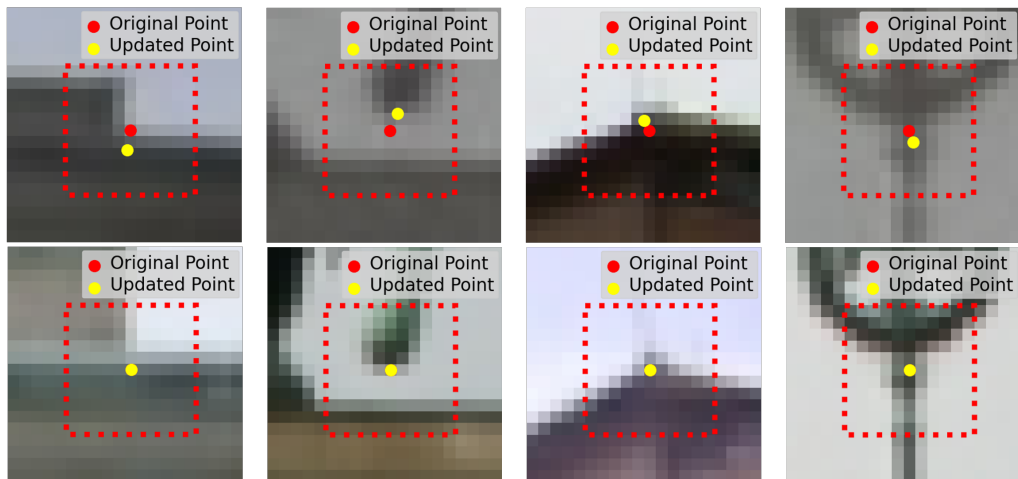

Figure 5. Example keypoint refinements for XRefine (top two rows), Keyp2Subpx (middle two rows), and PixSfM (bottom two rows). Keypoints are extracted from MegaDepth, using SuperPoint and LightGlue. Each column represents the extracted patches for a given pair of matched keypoints. The same four extracted keypoint matches are refined by the three refinement methods. The presented patches have a size of  $21 \times 21$  pixel, while the  $11 \times 11$  area that is given as input to XRefine and Keyp2Subpx is highlighted by the red dotted square.
